# Supplementary material for: Application of HR-NMR for the Metabolic Kinetic Assessment of Red Mullet (Mullus barbatus) and Bogue (Boops boops) Samples during Different Temperature Storage
Source: MDPI journal article supplement (doi:10.3390/metabo13040482), 2023-03-27
Supplement: s1 [file s1]

**Supplementary Table S1.** TMA-N concentrations for Red mullet (*Mullus barbatus*) and Bogue (*Boops boops*) samples at T0, T4, T7, T11, and T15. All the concentrations were calculated via NMR by using the protocol fine-tuned by Ciampa et al. [8].

|                                            | TMA-N (mg/100g) |                |
|--------------------------------------------|-----------------|----------------|
|                                            | +4 °C           | 0 °C           |
| <b>Red mullet (<i>Mullus barbatus</i>)</b> |                 |                |
| T0                                         | 0.11 ± 0.03     | 0.11 ± 0.03    |
| T4                                         | 2.856 ± 0.20    | 0.756 ± 0.30   |
| T7                                         | 13.26 ± 2.36    | 1.285 ± 0.14   |
| T11 / T15*                                 | 24.85 ± 1.07    | 12.62 ± 2.09   |
| <b>Bogue (<i>Boops boops</i>)</b>          |                 |                |
| T0                                         | 0.027 ± 0.0009  | 0.027 ± 0.0009 |
| T4                                         | 0.657 ± 0.072   | 0.141 ± 0.030  |
| T7                                         | 6.78 ± 0.679    | 0.304 ± 0.061  |
| T11 / T15*                                 | 17.68 ± 4.31    | 6.46 ± 0.92    |

\* T11 and T15 are the last days of sampling for storage at 0 °C and +4 °C respectively

**Supplementary Table S2.** K-index values (%) for Red mullet (*Mullus barbatus*) and Bogue (*Boops boops*) samples at T0, T4, T7, T11, and T15. All the concentrations were calculated via NMR by using the protocol fine-tuned by Ciampa et al. [8].

|                                            | TMA-N (mg/100g) |              |
|--------------------------------------------|-----------------|--------------|
|                                            | +4 °C           | 0 °C         |
| <b>Red mullet (<i>Mullus barbatus</i>)</b> |                 |              |
| T0                                         | 27.87 ± 1.90    | 27.87 ± 1.90 |
| T4                                         | 69.28 ± 1.50    | 44.78 ± 3.30 |
| T7                                         | 89.74 ± 1.30    | 70.41 ± 1.90 |
| T11 / T15*                                 | 92.67 ± 1.50    | 85.99 ± 1.80 |
| <b>Bogue (<i>Boops boops</i>)</b>          |                 |              |
| T0                                         | 10.42 ± 1.50    | 27.87 ± 1.90 |
| T4                                         | 37.17 ± 2.60    | 35.06 ± 7.80 |
| T7                                         | 60.64 ± 1.80    | 38.89 ± 2.40 |
| T11 / T15*                                 | 79.45 ± 5.90    | 69.44 ± 2.40 |

\* T11 and T15 are the last days of sampling for storage at 0 °C and +4 °C respectively

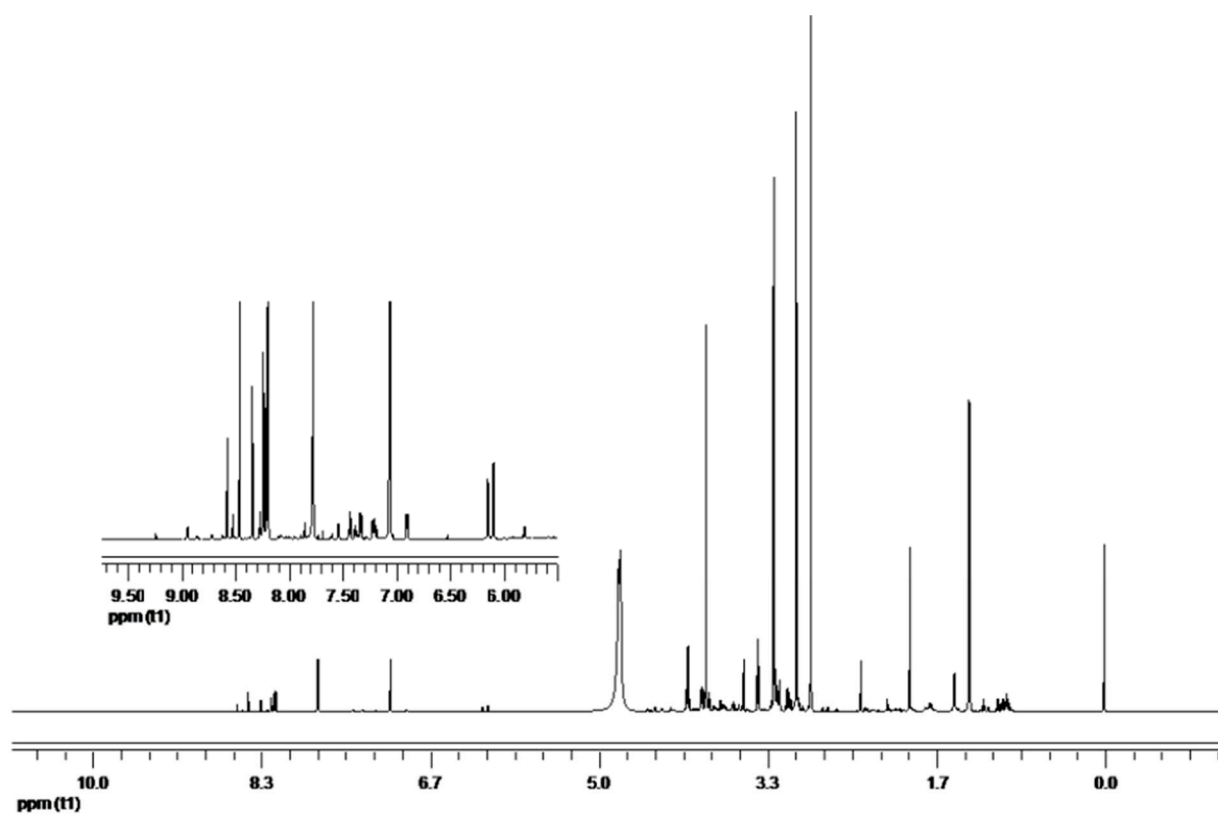

**Supplementary Figure S1:** a typical <sup>1</sup>H-NMR spectrum of fish recorded at 298 K with a Bruker AVANCE spectrometer operating at a frequency of 600.13 MHz.

**Supplementary Table S3 :** metabolites identified in <sup>1</sup>H-NMR spectrum, recorded with 600 MHz spectrometer, of Bogue (*Boops boops*) muscle extract.

| Compound                         | Assignment                             | <sup>1</sup> H (ppm) | Multiplicity |
|----------------------------------|----------------------------------------|----------------------|--------------|
| Isoleucine (Ile)                 | δ-CH <sub>3</sub>                      | 0.94                 | t            |
| Leucine (Leu)                    | δ'-CH <sub>3</sub>                     | 0.96                 | d            |
| Valine (Val)                     | γ-CH <sub>3</sub> - γ'-CH <sub>3</sub> | 1.00-1.05            | d            |
| Ethanol                          | CH <sub>3</sub>                        | 1.19                 | t            |
| Lactate (La)                     | β-CH <sub>3</sub>                      | 1.33                 | d            |
| Alanine (Ala)                    | β-CH <sub>3</sub>                      | 1.49                 | d            |
| Acetate                          | CH <sub>3</sub>                        | 1.93                 | s            |
| Methionine (Met)                 | S-CH <sub>3</sub>                      | 2.14                 | s            |
| Succinate                        | α, β-CH <sub>2</sub>                   | 2.41                 | s            |
| Trimethylamine (TMA-N)           | N-CH <sub>3</sub>                      | 2.90                 | s            |
| Creatine/Phosphocreatine         | N-CH <sub>3</sub> and N=C              | 3.04                 | s            |
| Oxide Trimethylamine (TMAO)      | N-CH <sub>3</sub>                      | 3.27                 | s            |
| Taurin (Tau)                     | N-CH <sub>2</sub>                      | 3.42                 | t            |
| Glycine (Gly)                    | α-CH                                   | 3.56                 | s            |
| Glutamate (Glu)                  | α CH                                   | 3.75                 | t            |
| Creatine/Phosphocreatine         | N-CH <sub>2</sub>                      | 3.94                 | s            |
| Serine (Ser)                     | β-CH                                   | 3.98                 | dd           |
| α-Glucose (α-GLC)                | CH-1                                   | 5.24                 | d            |
| Inosine (HxR)                    | CH-1', ribosio                         | 6.10                 | d            |
| Inosine 5'-monophosphate (IMP)   | CH-1', ribosio                         | 6.14                 | d            |
| Tyrosine (Tyr)                   | C3, 5H, ring                           | 6.88                 | d            |
| Histidine (His)                  | C2H ring/C4H ring                      | 7.06/7.77            | s            |
| Tryptophan (Trp)                 | C5H ring                               | 7.19                 | t            |
| Phenylalanine (Phe)              | CH-2,6                                 | 7.32                 | m            |
| Hypoxanthine (Hx)                | CH-8                                   | 8.19                 | s            |
| Hypoxanthine (Hx)                | CH-2                                   | 8.21                 | s            |
| Inosine (HxR)                    | CH-8                                   | 8.233                | s            |
| Inosine 5'- monophosphate (IMP)  | CH-8                                   | 8.236                | s            |
| Adenosine5' triphosphate (ATP)   | CH-8                                   | 8.27                 | s            |
| Adenosine5'- diphosphate (ADP)   |                                        |                      |              |
| Adenosine 5'-monophosphate (AMP) |                                        |                      |              |
| Inosine (HxR)                    | CH <sub>2</sub> , ring                 | 8.33                 | s            |
| Formate (Fo)                     | CH                                     | 8.46                 | s            |
| Inosine 5'- monophosphate (IMP)  | CH <sub>2</sub> , ring                 | 8.57                 | s            |
